# Supplementary material for: The unexpected reactivity of Zeise's anion in strong basic medium discloses new substitution patterns at the platinum centre
Source: Royal Society of Chemistry journal article supplement (doi:10.1039/b516818j), 2006-01-01
Supplement: b516818j.pdf [file b516818j.pdf]

## Supplementary Material

### The Unexpected Reactivity of Zeise's Anion in Strong Basic Medium Discloses New Substitution Patterns at the Platinum Centre

Michele Benedetti,<sup>a</sup> Francesco P. Fanizzi,<sup>\*a</sup> Luciana Maresca<sup>\*b</sup> and Giovanni Natile<sup>b</sup>

<sup>a</sup> *Dipartimento di Scienze e Tecnologie Biologiche ed Ambientali, Università degli Studi di Lecce, Via Monteroni, I-73100 Lecce, Italy. E-mail: fp.fanizzi@unile.it; Fax: +39 0832 298626; Tel: +39 0832 298867.*

<sup>b</sup> *Dipartimento Farmaco-Chimico, Università degli Studi di Bari, Via E. Orabona 4, I-70125 Bari, Italy. E-mail: maresca@farmchim.uniba.it; Fax: +39 080 5442230; Tel: +39 080 5442759.*

#### Experimental Section

**Materials.** All solvents and reagents, except otherwise stated, were purchased from Aldrich Chemical Company and used as received. Zeise's salt was prepared from potassium tetrachloroplatinate and ethylene gas as previously described.<sup>20</sup>

#### Synthesis of complexes

**[Pt( $\eta^1$ -C<sub>2</sub>H<sub>4</sub>OMe)Cl(Me<sub>4</sub>en)], 7a.** Zeise's salt (245 mg, 0.633 mmol) and KOH (71 mg, 1.3 mmol) were dissolved in 10 mL of cold MeOH (0 °C, ice bath); a white precipitate of KCl immediately formed and the colour of the solution changed from bright to pale yellow. After a couple of minutes **Me<sub>4</sub>en** (74 mg, 0.64 mmol) was introduced in the reaction vessel and the mixture was stirred for about 3 hours; meanwhile the solution became completely colourless. The solvent was evaporated under vacuum and the solid residue was repeatedly extracted with CH<sub>2</sub>Cl<sub>2</sub> (total used volume ~30 mL). The CH<sub>2</sub>Cl<sub>2</sub> solution was kept stirring for few minutes over Na<sub>2</sub>SO<sub>4</sub>, then filtered on a celite bed and finally evaporated to dryness under vacuum. The white solid residue was **7a** (240 mg, 0.59

mmol). The isolated yield, referred to platinum, was 94 %. (Found: C, 26.6; H, 5.6; N, 7.0 %.  $C_9H_{23}ClN_2OPt$  requires C, 26.6; H, 5.7; N, 6.9 %).  $\delta_H(CDCl_3)$  3.47 (m, 2H, *O*-CH<sub>2</sub>-), 3.31 (s, 3H, *O*-CH<sub>3</sub>), 2.89 (s, 3H, *N*-CH<sub>3</sub>,  $^3J_{Pt-H} = 51$  Hz), 2.78 (m, 2H, *N*-CH<sub>2</sub>-), 2.71 (s, 3H, *N*-CH<sub>3</sub>,  $^3J_{Pt-H} = 13$  Hz), 2.54 (m, 2H, *N*-CH<sub>2</sub>-), 1.62 (m, 2H, *Pt*-CH<sub>2</sub>-,  $^2J_{Pt-H} = 93$  Hz).

**[Pt( $\eta^1$ -C<sub>2</sub>H<sub>4</sub>OMe)Cl(dip)]**, **7b**; **[Pt( $\eta^1$ -C<sub>2</sub>H<sub>4</sub>OMe)Cl(phen)]**, **7c**; **[Pt( $\eta^1$ -C<sub>2</sub>H<sub>4</sub>OMe)Cl(Me<sub>2</sub>phen)]**, **7d**. The synthetic procedures were similar to that used for **7a**. However, in the present cases, a slightly higher base/platinum ratio and a lower temperature (-20 °C) were used. The used quantities were: MeOH, 5 mL; KOH, 300 mg (5.3 mmol); Zeise's salt, 500 mg (1.29 mmol); **dip**, 220 mg, or **phen**·H<sub>2</sub>O, 283 mg, or **Me<sub>2</sub>phen**, 297 mg (1.4 mmol in each case). The final products (**7b**, **7c**, and **7d**, respectively) have a limited solubility in the reaction medium and precipitate from solutions as yellow powders. After 3-5 hour stirring, the reaction mixture was filtered on a sintered glass filter, the solid was washed with abundant water to eliminate co-precipitated KCl, and dried under vacuum. 500 mg of **7b** (1.1 mmol, yield 87 %), 582 mg of **7c** (1.24 mmol, yield 96 %), and 280 mg of **7d** (0.56 mmol, yield 45 %) were obtained (isolated yields are referred to platinum). {(**7b**) Found: C, 35.3; H, 3.5; N, 6.2 %.  $C_{13}H_{15}ClN_2OPt$  requires C, 35.0; H, 3.4; N, 6.3 %).  $\delta_H(CDCl_3)$  9.59 (d, 1H, CH,  $^3J_{H-H} = 6$  Hz,  $^3J_{Pt-H} = 15$  Hz); 9.23 (d, 1H, CH,  $^3J_{H-H} = 6$  Hz,  $^3J_{Pt-H} = 60$  Hz); 8.12 (m, 2H, CH); 7.99 (m, 2H, CH); 7.62 (m, 1H, CH); 7.50 (m, 1H, CH); 3.61 (m, 2H, *O*-CH<sub>2</sub>); 3.39 (s, 3H, *O*-CH<sub>3</sub>); 2.22 (m, 2H, *Pt*-CH<sub>2</sub>-,  $^2J_{Pt-H} = 90$  Hz)};<sup>21</sup> {(**7c**) Found: C, 37.7; H, 2.9; N, 6.3 %.  $C_{15}H_{15}ClN_2OPt$  requires C, 38.2; H, 3.2; N, 6.0 %).  $\delta_H(CDCl_3)$  9.81 (d, 1H, CH,  $^3J_{H-H} = 6$  Hz,  $^3J_{Pt-H} = 12$  Hz); 9.53 (d, 1H, CH,  $^3J_{H-H} = 6$  Hz,  $^3J_{Pt-H} = 57$  Hz); 8.65 (d, 1H, CH,  $^3J_{H-H} = 9$  Hz); 8.55 (d, 1H, CH,  $^3J_{H-H} = 9$  Hz); 7.95 (m, 3H, CH); 7.81 (d.d., 1H, CH,  $^3J_{H-H} = 9$  Hz,  $^3J_{H-H} = 6$  Hz); 3.70 (m, 2H, CH<sub>2</sub>); 3.42 (s, 3H, OCH<sub>3</sub>); 2.41 (m, 2H, *Pt*-CH<sub>2</sub>-,  $^2J_{Pt-H} = 90$  Hz)};<sup>21</sup> {(**7d**) Found: C, 40.5; H, 3.6; N, 5.5 %.  $C_{17}H_{19}ClN_2OPt$  requires C, 41.0; H, 3.9; N, 5.6 %).  $\delta_H(CDCl_3)$  8.33 (d, 1H, CH,  $^3J_{H-H} = 9$  Hz); 8.28 (d, 1H, CH,  $^3J_{H-H} = 9$  Hz); 7.75 (s, 1H, CH); 7.74 (s,

1H, CH); 7.59 (d, 1H, CH,  $^3J_{\text{H-H}} = 9$  Hz); 7.56 (d, 1H, CH,  $^3J_{\text{H-H}} = 9$  Hz); 3.71 (m, 2H, *O*-CH<sub>2</sub>); 3.33 (s, 3H, *O*-CH<sub>3</sub>); 3.19 (s, 3H, *N*-CH<sub>3</sub>); 2.98 (s, 3H, *N*-CH<sub>3</sub>); 2.33 (m, 2H, *Pt*-CH<sub>2</sub>,  $^2J_{\text{Pt-H}} = 95$  Hz)}.<sup>21</sup>

**[PtCl( $\eta^2$ -C<sub>2</sub>H<sub>4</sub>)(Me<sub>4</sub>en)]BF<sub>4</sub>, 8a.** Synthesis of **8a** can be carried out according to previously described methods.<sup>18</sup>

**[PtCl( $\eta^2$ -C<sub>2</sub>H<sub>4</sub>)(dip)]BF<sub>4</sub>, 8b.** 0.464 g (1.04 mmol) of [Pt(CH<sub>2</sub>CH<sub>2</sub>OMe)Cl(**dip**)] (**7b**) were dissolved in CH<sub>2</sub>Cl<sub>2</sub> (250 mL). To the solution was added first absolute EtOH (2.5 mL) and then concentrated HBF<sub>4</sub> ( $\approx 70$  % in H<sub>2</sub>O) until pH  $\sim 1$ . During the acidification process the colour of the solution turned from yellow to pale yellow and a light yellow precipitate separated out. The solvent was evaporated under vacuum (no heating was applied to the reaction vessel) and from time to time absolute EtOH was added to the mixture so that the volume of the liquid phase never became less than 25 mL (in this way all the CH<sub>2</sub>Cl<sub>2</sub> could be removed while the residual EtOH prevented the concentration of excess HBF<sub>4</sub> to reach levels that could have caused product decomposition). The precipitate was separated by filtration of the solution, washed with abundant absolute ethanol (until the apparent pH of the washing ethanol was neutral) and dried. 469 mg (0.93 mmol) of **8b** were obtained; the isolated yield, referred to platinum, was 90 %. (Found: C, 28.1; H, 2.4; N, 5.7 %. C<sub>12</sub>H<sub>13</sub>BClF<sub>4</sub>N<sub>2</sub>Pt requires C, 28.7; H, 2.6; N, 5.6 %).  $\delta_{\text{H}}(\text{d}_6\text{-Acetone})$  9.47 (d, 1H, CH,  $^3J_{\text{H-H}} = 6$  Hz,  $^3J_{\text{Pt-H}} = 36$  Hz); 8.85 (d, 1H, CH,  $^3J_{\text{H-H}} = 6$  Hz); 8.78 (d, 1H, CH,  $^3J_{\text{H-H}} = 9$  Hz); 8.71 (t, 1H, CH,  $^3J_{\text{H-H}} = 6$  Hz); 8.59 (m, 2H, CH); 8.18 (m, 1H, CH); 7.97 (m, 1H, CH); 5.29 (s, 4H, CH<sub>2</sub>,  $^3J_{\text{Pt-H}} = 54$  Hz).<sup>21</sup>

**[PtCl( $\eta^2$ -C<sub>2</sub>H<sub>4</sub>)(phen)]BF<sub>4</sub>, 8c.** The preparative procedure was analogous to that used for **8b**. Being **7c** less soluble in chlorinated solvents than **7b**, 504 mg (1.07 mmol) of [Pt-(CH<sub>2</sub>CH<sub>2</sub>OMe)Cl(**phen**)] required 500 ml of CH<sub>2</sub>Cl<sub>2</sub> to be completely dissolved. All the operations were performed as described for **8b**. 532 mg (1.01 mmol) of **8c** were obtained; the isolated yield, referred to platinum, was 94 %. (Found: C, 31.5; H, 2.3; N, 5.4 %. C<sub>14</sub>H<sub>13</sub>BClF<sub>4</sub>N<sub>2</sub>Pt requires C, 31.9; H, 2.5; N, 5.3 %).  $\delta_{\text{H}}(\text{d}_6\text{-Acetone})$  9.71 (d, 1H, CH,  $^3J_{\text{H-H}} = 6$  Hz,  $^3J_{\text{Pt-H}} = 36$  Hz); 9.33 (d, 1H,

CH,  $^3J_{\text{H-H}} = 8$  Hz); 9.21 (d, 1H, CH,  $^3J_{\text{H-H}} = 9$  Hz); 9.04 (d, 1H, CH,  $^3J_{\text{H-H}} = 6$  Hz,  $^3J_{\text{Pt-H}} = 38$  Hz);  
8.5 (m, 3H, 3CH); 8.28 (d.d., 1H, CH,  $^3J_{\text{H-H}} = 8$  Hz,  $^3J_{\text{H-H}} = 6$  Hz); 5.45 (s, 4H, 2CH<sub>2</sub>,  $^3J_{\text{Pt-H}} = 60$   
Hz).<sup>21</sup>

### Notes and references

20 Chock, J. Halpern and F. E. Paulik, *Inorg. Synth.*, 1990, **28**, 349.

21 The small splitting due to  $^4J_{\text{H-H}}$  has been neglected.
